# Supplementary material for: Report drawn up on behalf of the Committee on Budgetary Control on the decision granting a discharge in respect of the implementation of the budget of the European Communitiesfor the 1983 financial year. Part C: Opinions delivered by the various committees. Working Documents 1985-86, Document 1 2-10/85/C, 2 April 1985
Source: Royal Society of Chemistry journal article supplement (doi:10.1039/b913253h), 1985-01-01

***Electronic Supplementary Information 1.***

Fluorescent image of the spirals based mixer chip: study of the mixing efficiency. The mixing efficiency is calculated as the ratio of the mean signal of the six quantification spots in the red box to the mean signal of the six quantification spots in the white box. Total flow rate 50  $\mu\text{L}/\text{min}$ .

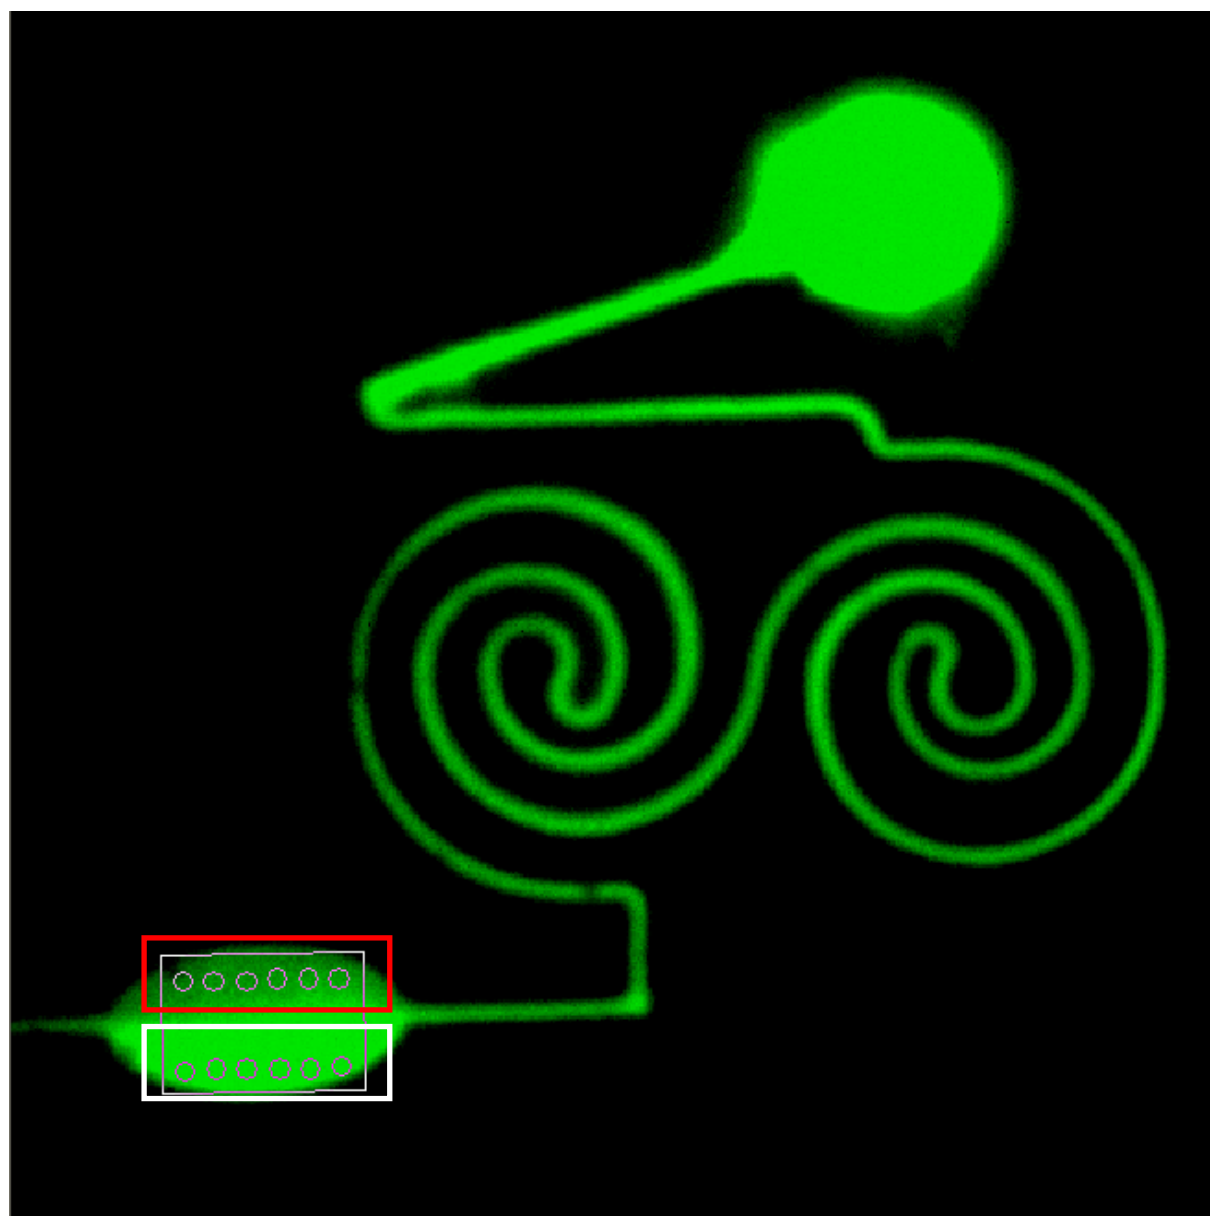

***Electronic Supplementary Information 2.***

Chemiluminescent image of a batch biochip for CRP detection obtained following incubation with 110 µg/L of free CRP.

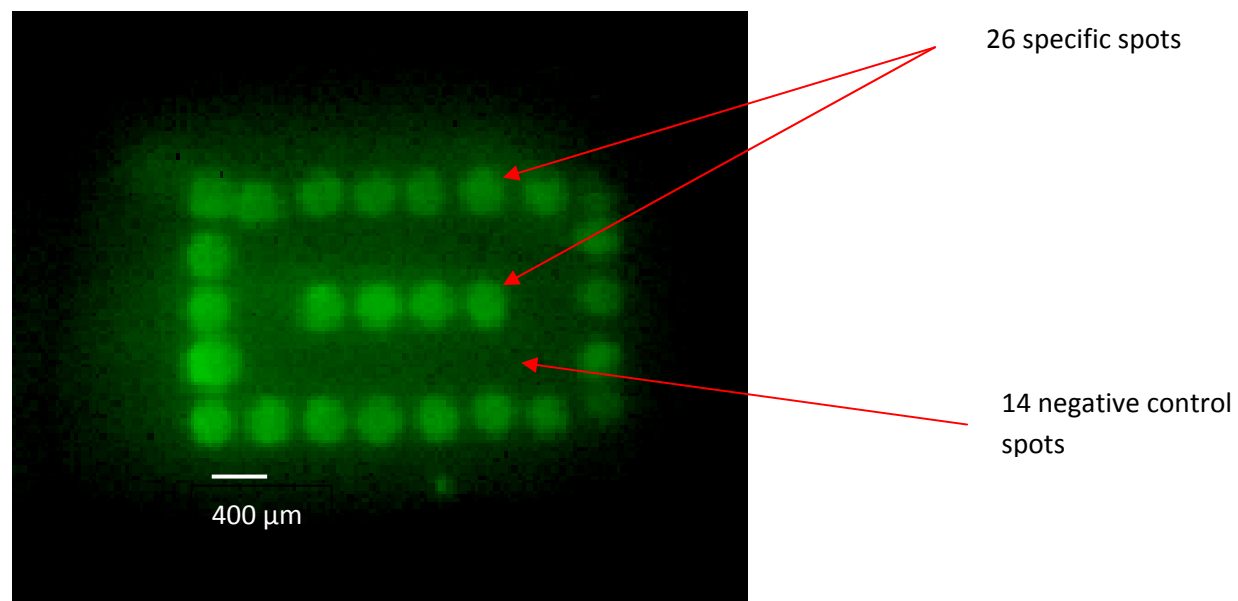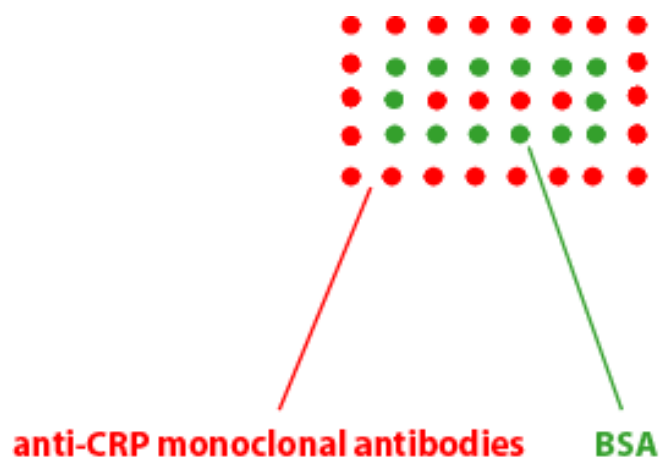

### *Electronic Supplementary Information 3.*

Sandwich assay calibration curves of the three target protein (C-reactive protein, c-Troponin I and Brain Natriuretic Peptide). Monoclonal antibodies were immobilised using the Print-n-Shrink procedure. Each point is the mean of three experiments, error bars correspond to the standard deviation of each point.

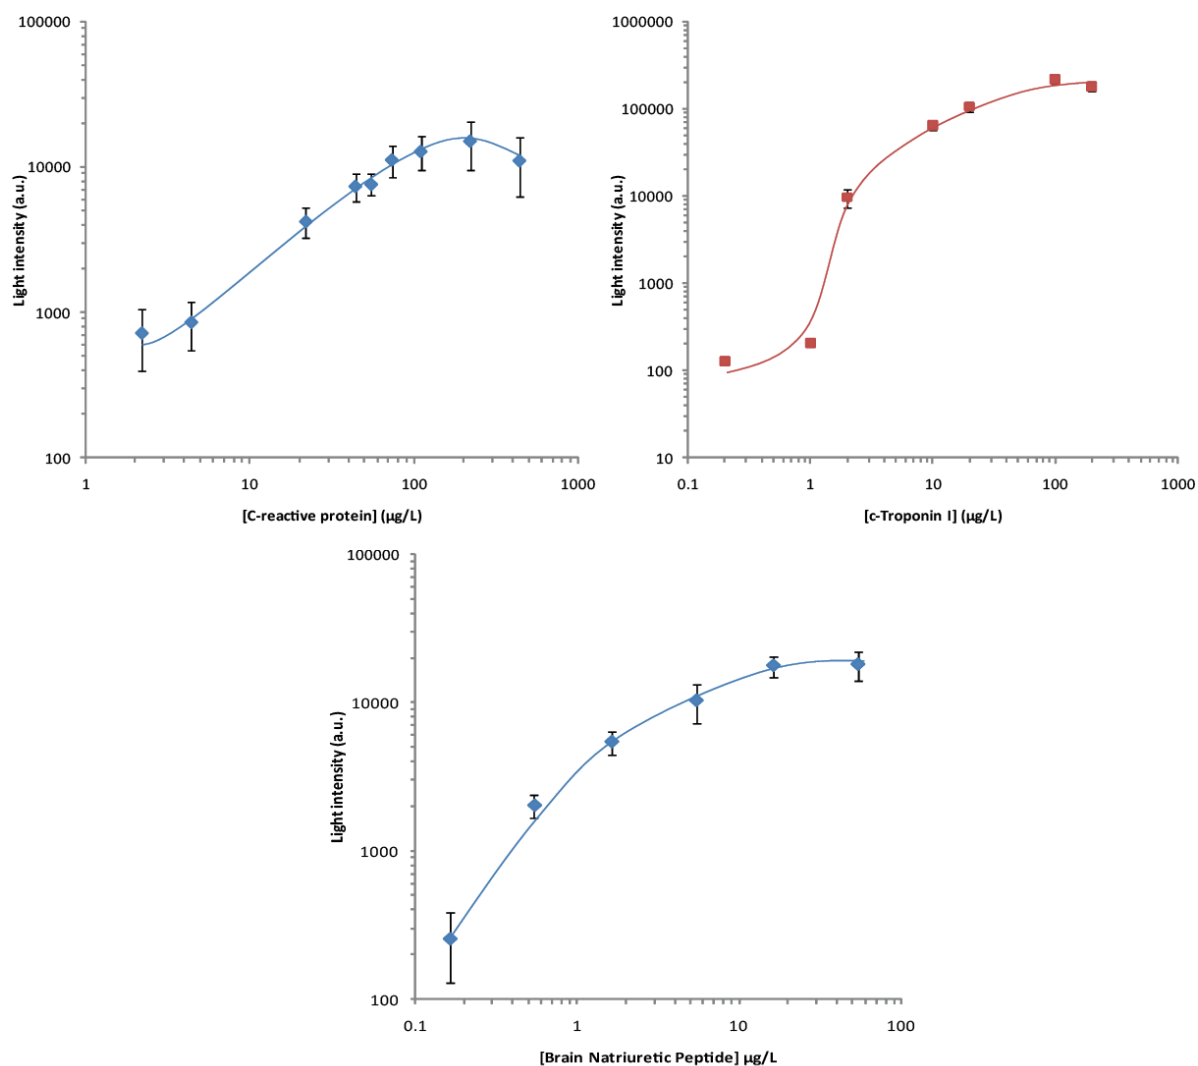

***Electronic Supplementary Information 4.***

Spotting pattern and biochip printed design for the multiparametric microfluidic immunoassay studies.

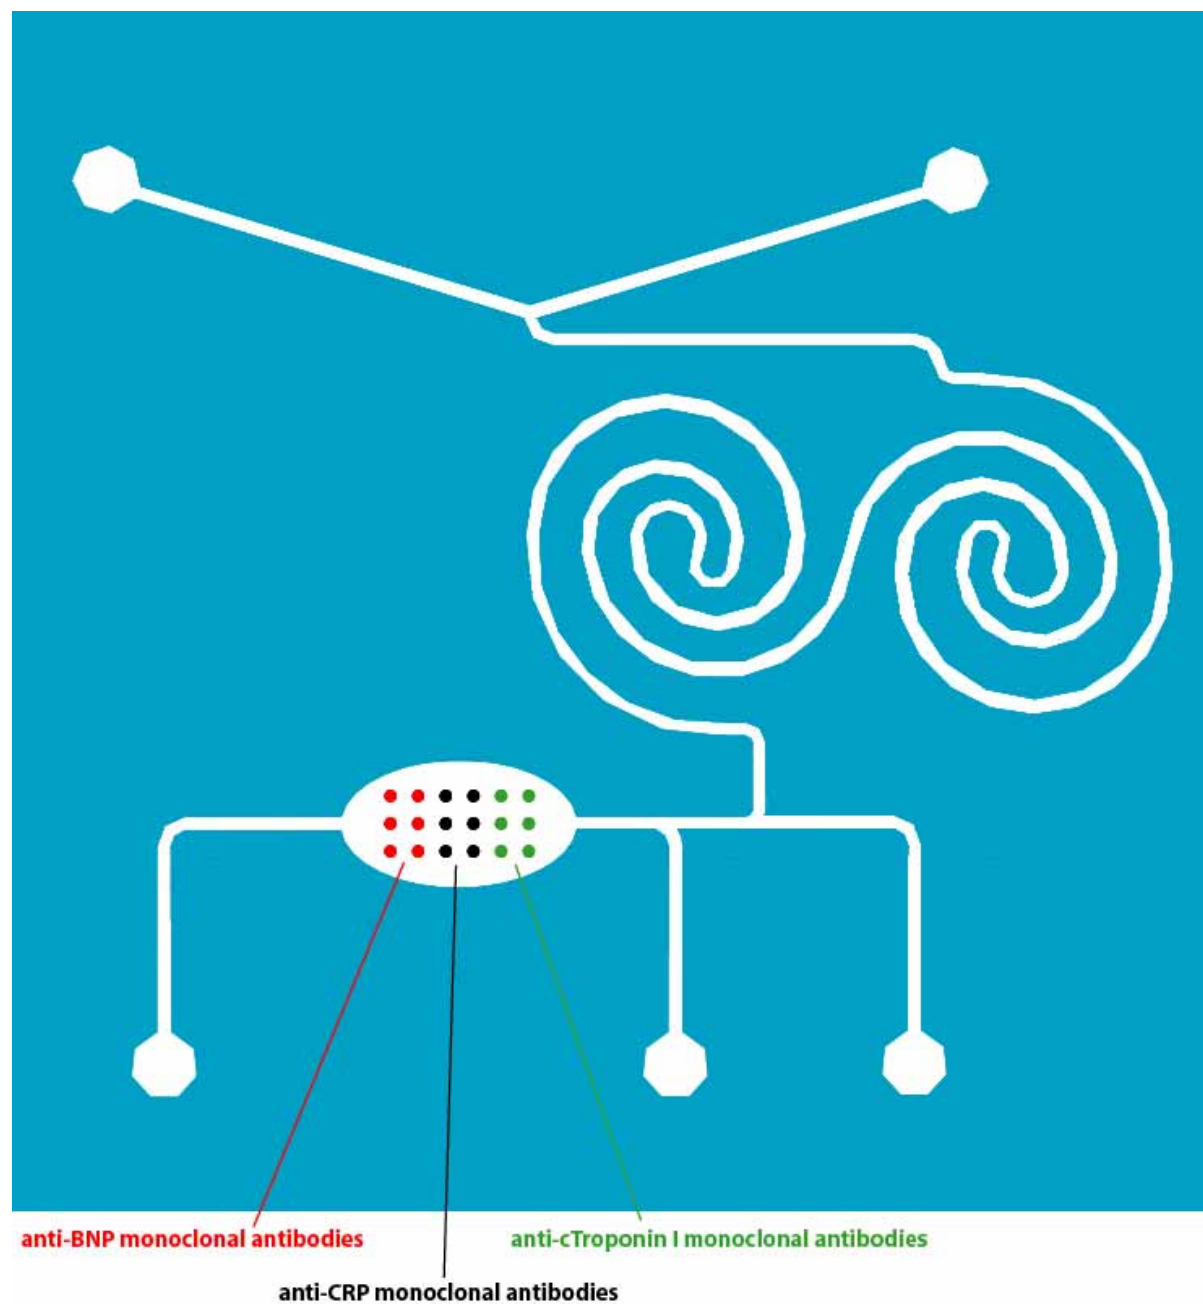

*Electronic Supplementary Information 5.*

Spotting pattern and biochip printed design for the localised cell culture study.

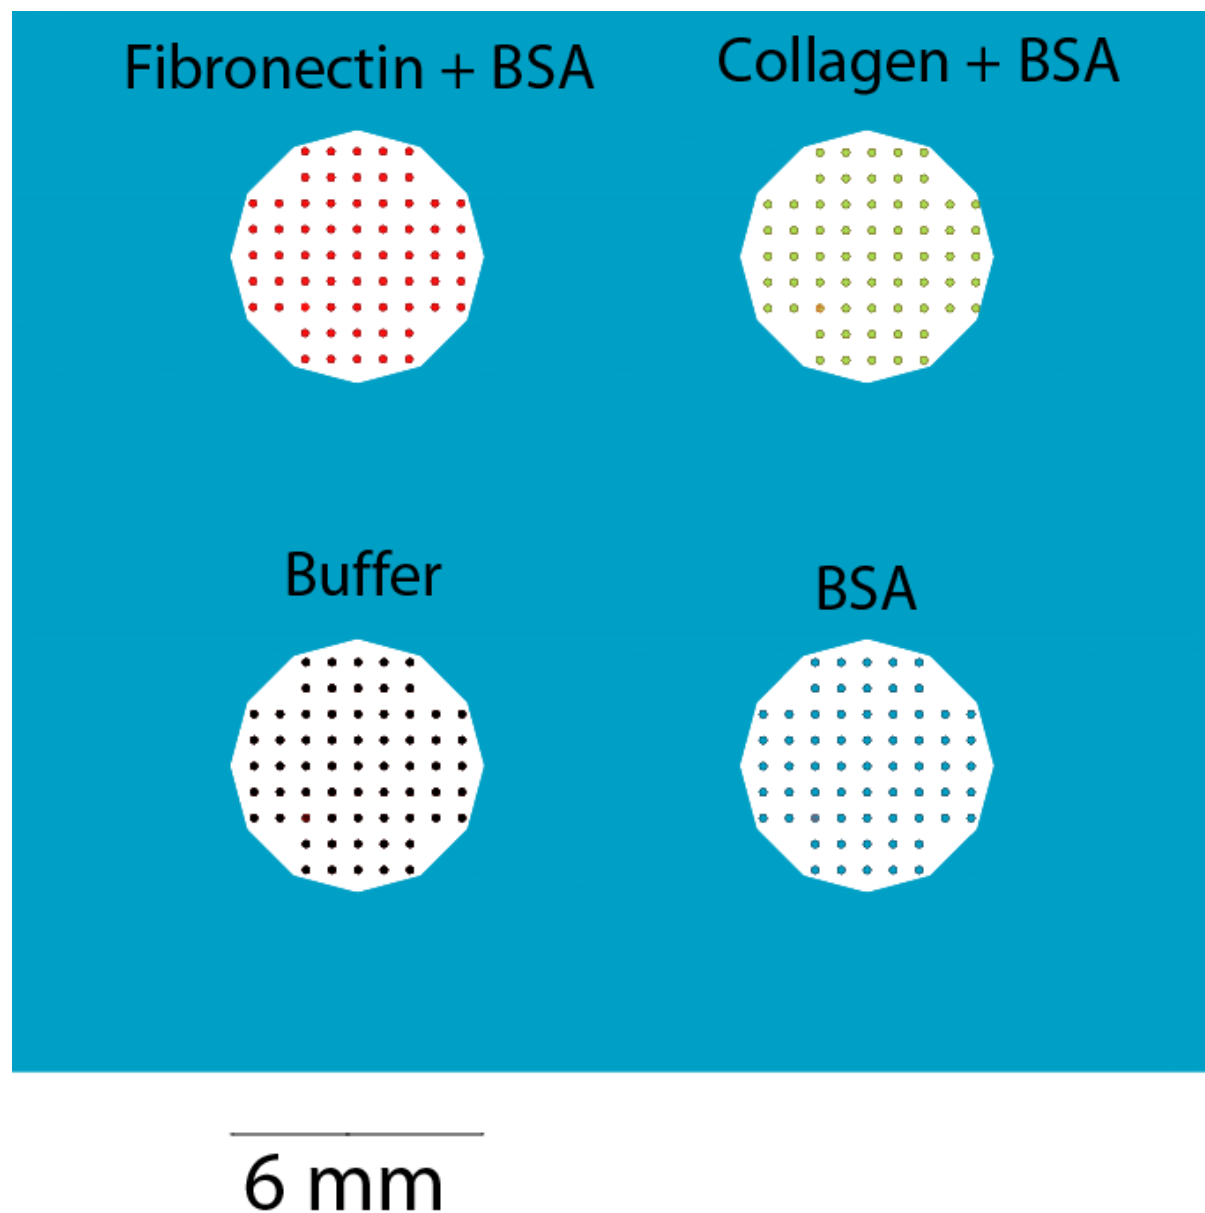

Supplement: b913253h.pdf [file b913253h.pdf]
